# Supplementary material for: Cleaner and sustainable synthesis of high-quality monoglycerides by use of enzyme technologies: techno-economic and environmental study for monolaurin
Source: Springer Nature journal article supplement (doi:10.1007/s10098-023-02577-1), 2023-07-26
Supplement: MOESM1 [file 10098_2023_2577_MOESM1_ESM.pdf]

### Supplementary data:

- The calculations of the CO<sub>2</sub> eq./year for all (ENZ vs CHEM/AUT) processes due to **thermal energy** consumption were calculated as follows:

Given:

- From table 7\_AUT, the daily steam consumption (CHEM/AUT) is equivalent to 22700 MJ

- 1 GJ of thermal energy generates 55.82 kg of CO<sub>2</sub>

1. Converting MJ to GJ (dividing by 1000) =  $22700/1000 = 22.7$  GJ

2. Converting energy consumption in terms of GJ to the quantity of CO<sub>2</sub> eq.

daily generation of CO<sub>2</sub> (kg CO<sub>2</sub> eq./d) =  $(22.7 \times 55.82) = 1267.1$  kg CO<sub>2</sub> eq

dividing by 1000

Daily generation of CO<sub>2</sub> (t CO<sub>2</sub> eq.) =  $1267.1/1000 = 1.267$  t CO<sub>2</sub> eq

Annual generation of CO<sub>2</sub> =  $1.267 \times 330 = 418$  t CO<sub>2</sub> eq. (table 7)

---

- From table 7\_ENZ, the daily steam consumption is equivalent to 1713 MJ

- 1 GJ of thermal energy generates 55.82 kg of CO<sub>2</sub>

1. Converting MJ to GJ (dividing by 1000) =  $1713/1000 = 1.713$  GJ

2. Converting energy consumption in terms of GJ to the quantity of CO<sub>2</sub> eq.

daily generation of CO<sub>2</sub> (kg CO<sub>2</sub>  $\frac{\text{eq}}{\text{d}}$ ) =  $(1.713 \times 55.82) = 95.62$  kg CO<sub>2</sub> eq

dividing by 1000

Daily generation of CO<sub>2</sub> (t CO<sub>2</sub> eq.) =  $95.62/1000 = 0.0956$  t CO<sub>2</sub> eq

Annual generation of CO<sub>2</sub> =  $0.0956 \times 330 = 31.55$  t CO<sub>2</sub> eq. (table 7)

---

- The calculations of the CO<sub>2</sub> eq./year for both processes due to **electrical energy** consumption were calculated as follows:

- Given\_ 1 kWh equivalent to 438.64 g CO<sub>2</sub> eq (Mata et al., 2018)

- Given in table 7\_AUT/CHEM, the daily electrical energy consumption is 1800 kWh

Daily generation of t CO<sub>2</sub> =  $(1800 \times 438.64) / 1000000 = 0.7895$  t CO<sub>2</sub>

Annual generation of t CO<sub>2</sub> =  $0.7895 \times 330 = 260.55$  t CO<sub>2</sub> (see table 11)

---

---

- Given in table 7\_ENZ, the daily electrical energy consumption is 125 kWh

$$\text{Daily generation of t CO}_2 = (125 \times 438.64) / 1000000 = 0.05483 \text{ t CO}_2$$

$$\text{Annual generation of t CO}_2 = 0.05483 \times 330 = 18 \text{ t Co}_2 \text{ (see table 11)}$$

---

t CO<sub>2</sub> due to lauric acid production \_AUT, given that the energy consumption to produce 1 tone of lauric acid is 500 kcal (source is Oleo Misr Company)

$$= 11.595 \times 330 \times 500 \text{ kcal} = 1,912,680 \text{ kcal}$$

Divide by 238.8 to convert from kcal to mj = 1,912,680 kcal / 238.8 = 8009 mj (equivalent to 147 t CO<sub>2</sub> equivalent)

t CO<sub>2</sub> due to lauric acid production \_AUT, given that the energy consumption to produce 1 tone of glycerin is 700 kcal (source is Oleo Misr Company)

$$= 5.208 \times 330 \times 700 = 1203048 \text{ kcal}$$

Divide by 238.8 to convert from kcal to mj = 1203048 kcal / 238.8 = 5038 mj (equivalent to 92.8 t CO<sub>2</sub> equivalent)

t CO<sub>2</sub> due to palm kernel transportation \_AUT, given that lauric acid quantity is multiplied by 1.05 to convert it to total fatty matter, and the distance between Egypt and Malaysia is 7925 km

$$11.595 \times 330 \times 1.05 \times 0.133 / 1000 = 4380 \text{ t CO}_2$$

---

t CO<sub>2</sub> due to lauric acid production \_ENZ, given that the energy consumption to produce 1 tone of lauric acid is 500 kcal (source is Oleo Misr Company)

$$= 10.868 \times 330 \times 500 \text{ kcal} = 1,793,220 \text{ kcal}$$

Divide by 238.8 to convert from kcal to mj = 1,793,220 kcal / 238.8 = 7509 mj (equivalent to 138 t CO<sub>2</sub> equivalent)

t CO<sub>2</sub> due to lauric acid production \_ENZ, given that the energy consumption to produce 1 tone of glycerin is 700 kcal (source is Oleo Misr Company)

$$= 4.883 \times 330 \times 700 = 1127973 \text{ kcal}$$

Divide by 238.8 to convert from kcal to mj =  $1127973 \text{ kcal} / 238.8 = 4723 \text{ mj}$  (equivalent to 87 t CO<sub>2</sub> equivalent)

t CO<sub>2</sub> due to palm kernel oil transportation \_ENZ, given that lauric acid quantity is multiplied by 1.05 to convert it to total fatty matter, and the distance between Egypt and Malaysia is 7925

$$10.866 \times 330 \times 1.05 \times 0.133 / 1000 = 3608 \text{ t CO}_2$$

t CO<sub>2</sub> due to enzyme transportation \_ENZ, and the distance between Egypt and Denmark is 3688 km

$$2.5 \text{ ton of enzyme} \times 3688 \times 0.133 \times 1000 = 1.2 \text{ t CO}_2$$
